# Supplementary material
Source: Royal Society of Chemistry journal article supplement (doi:10.1039/d5en00591d)
Supplement: d5en00591d1.pdf [file d5en00591d1.pdf]

## **Supporting Information**

### **Elucidating the Formation of Nanoplastics from Plastic Nurdles in Hydrocarbon-Contaminated Water**

## Table of Contents

|                                                                                                                                                                                                                                                                                                                                  |    |
|----------------------------------------------------------------------------------------------------------------------------------------------------------------------------------------------------------------------------------------------------------------------------------------------------------------------------------|----|
| <i>Estimation of wave power in the ocean</i>                                                                                                                                                                                                                                                                                     | 3  |
| <i>Estimation of power in ultrasonic agitation bath</i>                                                                                                                                                                                                                                                                          | 3  |
| <i>Molecular weight calculation of HDPE by Flory-Fox equation<sup>1</sup></i>                                                                                                                                                                                                                                                    | 4  |
| <b>Table S1:</b> <i>Composition of Naphtha obtained from detailed hydrocarbon analysis using gas chromatography<sup>2</sup></i>                                                                                                                                                                                                  | 5  |
| <b>Table S2:</b> <i>Final concentration and yield of NP formed in octane containing aqueous solutions from 150 mg of each type of nurdles in 15 mL of water and 150 <math>\mu</math>L of octane.</i>                                                                                                                             | 6  |
| <br>                                                                                                                                                                                                                                                                                                                             |    |
| <b>Figure S1:</b> <i>Differential Scanning Calorimetry (DSC) curve of HDPE</i>                                                                                                                                                                                                                                                   | 6  |
| <b>Figure S2:</b> <i>Photographs of emulsions produced from LDPE (left), PP (middle) and PS (right) in artificial sea water in the presence of 1% Octane.</i>                                                                                                                                                                    | 7  |
| <b>Figure S3:</b> <i>SEM images of emulsion samples from LDPE (left), PP (middle) and PS (right) in artificial sea water in the presence of 1% Octane, showing predominantly aggregates of salt crystals with no discernible sMPs and NPs.</i>                                                                                   | 7  |
| <b>Figure S4:</b> <i>Rotary orbital shaker used for low-energy mixing.</i>                                                                                                                                                                                                                                                       | 8  |
| <b>Figure S5:</b> <i>Photographs of emulsions containing mixtures of sMPs and NPs of LDPE, PP, and PS in water produced in the presence of hexanes (top), xylene (middle) and naphtha (bottom).</i>                                                                                                                              | 8  |
| <b>Figure S6:</b> <i>Size distribution of hexane-water and octane-water O/W emulsion droplets.</i>                                                                                                                                                                                                                               | 9  |
| <b>Figure S7:</b> <i>Photograph of water and nurdles (PE, PP, and PS) in the presence of octane after 24 hours of rotary agitation.</i>                                                                                                                                                                                          | 9  |
| <b>Figure S8:</b> <i>SEM image and corresponding size analysis of sMPs formed in water in the presence of 1% Octane.</i>                                                                                                                                                                                                         | 10 |
| <b>Figure S9:</b> <i>SEM images of control samples containing 1 vol% hydrocarbon impurities (top) and 1 wt% nurdles (bottom), prepared using ultrasonic agitation.</i>                                                                                                                                                           | 10 |
| <b>Figure S10:</b> <i>SEM images of PE NPs formed in water in the presence of ~1% naphtha. Note: the image at the right side shows the NP film formation due to the aggregation on the silicon substrate upon the evaporation of water.</i>                                                                                      | 11 |
| <b>Figure S11:</b> <i>SEM images of PP NPs formed in water in the presence of ~1% naphtha. Note: the image at the right side shows the NP film formation due to the aggregation on the silicon substrate upon the evaporation of water.</i>                                                                                      | 11 |
| <b>Figure S12:</b> <i>Average sizes of NPs produced in repeat experiments from LDPE (a), PP (b), and PS (c) in water in the presence of 1% hexane, octane and xylene, measured using dynamic light scattering.</i>                                                                                                               | 12 |
| <b>Figure S13:</b> <i>Zeta potentials of hexane-water and xylene-water-emulsions.</i>                                                                                                                                                                                                                                            | 12 |
| <b>Figure S14:</b> <i>SEM images of control samples containing 1 vol% hydrocarbon impurities (top) and 1 wt% nurdles (bottom), prepared using ultrasonic agitation.</i>                                                                                                                                                          | 13 |
| <b>Figure S15:</b> <i>QCM analysis of filtered polymer-octane suspensions after sonication. Frequency shifts (<math>\Delta F</math>) were monitored before, during, and after adding 20 <math>\mu</math>L NP suspension on the sensor. The final frequency stabilization indicates complete evaporation of the liquid phase.</i> | 13 |
| <b>Figure S16:</b> <i>Concentration of filtered NP suspensions obtained from ultrasonic agitation of 150 mg nurdles in 15 mL of water and 150 <math>\mu</math>L of octane.</i>                                                                                                                                                   | 14 |
| <b>Figure S17:</b> <i>FTIR spectra of control samples, prepared from the mixtures of polymer-water and hydrocarbon-water mixture.</i>                                                                                                                                                                                            | 14 |
| <b>Figure S18:</b> <i>Total ion chromatogram of low-density polyethylene nurdle extract in octane</i>                                                                                                                                                                                                                            | 15 |
| <b>Figure S19:</b> <i>SEM images of secondary microplastics (sMPs) obtained after 30 min of ultrasonic agitation of oligomer-depleted PE nurdles in water containing 1 wt% octane.</i>                                                                                                                                           | 15 |

**Estimation of wave power in the ocean**

The wave power in shallow water in the ocean can be expressed by the following equation:

$$P = E \times C_g = \frac{1}{8} \rho g H^2 \cdot \sqrt{gd} \dots\dots\dots(\text{Eq1})$$

Where,

$$E = \text{wave energy} = \frac{1}{8} \rho g H^2$$

$$C_g = \text{group velocity} = \sqrt{gd}$$

$\rho$  = density of water (1025 Kg/m<sup>3</sup>)

$g$  = gravitational acceleration (9.81 m/s<sup>2</sup>)

$H$  = wave height (m)

$d$  = water depth

Solving for a wave height of 2 m in a 4 m deep shoreline:

$$P = \frac{1}{8} \times 1025 \times 9.81 \times (2)^2 \cdot \sqrt{9.81 \times 4} = 31,494 \frac{W}{m} = 31.5 \frac{KW}{m}$$

**Estimation of power in ultrasonic agitation bath**

The power during ultrasonic agitation is calorimetrically determined, using the following equation:

$$Pv = \frac{C_p m \frac{\Delta T}{\Delta t}}{V} \dots\dots\dots(\text{Eq 2})$$

Where,

$C_p$  = Specific heat of water = 4186 J/Kg.K

$m$  = mass of liquid (Kg)

$\Delta T/\Delta t$  = rate of temperature change (K/s)

By solving the equation for 2 litres (2 Kg ) of water for which the temperature of water raise from 22 °C to 36 °C in 30 minutes:

$$Pv = \frac{4186 \frac{J}{Kg \cdot ^\circ C} \times 2 Kg \times \frac{(36 - 22)^\circ C}{1800 s}}{0.002 m^3} = 32,558 \frac{W}{m^3} = 32.5 \frac{KW}{m^3}$$

***Molecular weight calculation of HDPE by Flory-Fox equation<sup>1</sup>***

$$M_w = \frac{2RT_m T_m^\infty}{\Delta H_f(T_m^\infty - T_m)} = \frac{2 \times 8.314 \frac{J}{mol.k} \times 406.15 K \times 414 K}{2409.4 J/mol(414 - 406.15)K} = 148,000 \text{ g/mol}$$

Gas constant,  $R = 8.314 \frac{J}{mol.K}$

Observed melting temperature,  $T_m = 133 \text{ }^\circ\text{C} = 406.15 \text{ K}$

Equilibrium melting temperature,  $T_m^\infty = 141 \text{ }^\circ\text{C} = 414 \text{ K}$

Heat of fusion per mole of repeat ( $-CH_2$ ) unit,  $\Delta H_f \left( \frac{J}{mol} \right)$

$$= 172.1 \frac{J}{g} = 172.1 \frac{J}{g} \times 14 \frac{g}{mol} = 2409.4 J/mol$$

**Table S1: Composition of Naphtha obtained from detailed hydrocarbon analysis using gas chromatography<sup>2</sup>**

Method : D6729

| Composite report<br>Total by group type & carbon number<br>(in mass percent) |             |              |         |            |                   |         |
|------------------------------------------------------------------------------|-------------|--------------|---------|------------|-------------------|---------|
| Carbon                                                                       | n-Paraffins | Isoparaffins | Olefins | Naphthenes | Aromatics         | Total   |
| C4                                                                           | 0.020       | -            | 0.011   | -          | -                 | 0.031   |
| C5                                                                           | 12.566      | 7.819        | 0.043   | 1.052      | -                 | 21.480  |
| C6                                                                           | 12.466      | 16.830       | 0.104   | 8.808      | 1.269             | 39.478  |
| C7                                                                           | 5.059       | 8.485        | 0.102   | 8.215      | 2.141             | 24.003  |
| C8                                                                           | 1.471       | 3.957        | 0.564   | 2.450      | 1.327             | 9.769   |
| C9                                                                           | 0.502       | 1.064        | 0.326   | 0.468      | 0.845             | 3.204   |
| C10                                                                          | 0.199       | 0.412        | 0.012   | 0.093      | 0.291             | 1.007   |
| C11                                                                          | 0.103       | 0.103        | -       | -          | 0.150             | 0.355   |
| C12                                                                          | 0.065       | 0.035        | -       | 0.009      | 0.009             | 0.118   |
| Total                                                                        | 32.451      | 38.705       | 1.162   | 21.095     | 6.032             | 99.446  |
|                                                                              |             |              |         |            | Total Oxygenates: | 0.005   |
|                                                                              |             |              |         |            | Total Heavies:    | -       |
|                                                                              |             |              |         |            | Total unknowns:   | 0.549   |
|                                                                              |             |              |         |            | Grand Total:      | 100.000 |

| Composite report<br>Total by group type & carbon number<br>(in volume percent) |             |              |         |            |                   |         |
|--------------------------------------------------------------------------------|-------------|--------------|---------|------------|-------------------|---------|
| Carbon                                                                         | n-Paraffins | Isoparaffins | Olefins | Naphthenes | Aromatics         | Total   |
| C4                                                                             | 0.024       | 0.001        | 0.013   | -          | -                 | 0.037   |
| C5                                                                             | 13.827      | 8.686        | 0.045   | 0.973      | -                 | 23.531  |
| C6                                                                             | 13.010      | 17.641       | 0.103   | 7.958      | 0.995             | 39.707  |
| C7                                                                             | 5.095       | 8.570        | 0.099   | 7.428      | 1.701             | 22.893  |
| C8                                                                             | 1.441       | 3.879        | 0.544   | 2.217      | 1.054             | 9.135   |
| C9                                                                             | 0.481       | 1.017        | 0.308   | 0.409      | 0.666             | 2.882   |
| C10                                                                            | 0.188       | 0.386        | 0.011   | 0.079      | 0.228             | 0.892   |
| C11                                                                            | 0.096       | 0.096        | -       | -          | 0.099             | 0.290   |
| C12                                                                            | 0.060       | 0.031        | -       | 0.008      | 0.007             | 0.105   |
| Total                                                                          | 34.221      | 40.309       | 1.121   | 19.072     | 4.750             | 99.473  |
|                                                                                |             |              |         |            | Total Oxygenates: | 0.005   |
|                                                                                |             |              |         |            | Total Heavies:    | -       |
|                                                                                |             |              |         |            | Total unknowns:   | 0.522   |
|                                                                                |             |              |         |            | Grand Total:      | 100.000 |

**Table S2:** Final concentration and yield of NP formed in octane containing aqueous solutions from 150 mg of each type of nurdles in 15 mL of water and 150  $\mu$ L of octane.

| Polymer type | Concentration (ng/cm <sup>2</sup> ) | Concentration ( $\mu$ g/ml) | Average concentration ( $\mu$ g/ml) |             | Yield (%) |             |
|--------------|-------------------------------------|-----------------------------|-------------------------------------|-------------|-----------|-------------|
| PP           | 18556.50                            | 182.13                      | 162.77                              | $\pm$ 24.16 | 0.109     | $\pm$ 0.016 |
| PP           | 17369.63                            | 170.48                      |                                     |             |           |             |
| PP           | 13825.62                            | 135.70                      |                                     |             |           |             |
| LDPE         | 13785.61                            | 135.31                      | 135.96                              | $\pm$ 33.92 | 0.091     | $\pm$ 0.023 |
| LDPE         | 17341.46                            | 170.21                      |                                     |             |           |             |
| LDPE         | 10429.66                            | 102.37                      |                                     |             |           |             |
| HDPE         | 9203.19                             | 90.33                       | 94.49                               | $\pm$ 11.59 | 0.063     | $\pm$ 0.008 |
| HDPE         | 8716.28                             | 85.55                       |                                     |             |           |             |
| HDPE         | 10961.50                            | 107.59                      |                                     |             |           |             |
| PS           | 747.00                              | 7.33                        | 4.77                                | $\pm$ 3.62  | 0.003     | $\pm$ 0.002 |
| PS           | 224.90                              | 2.21                        |                                     |             |           |             |

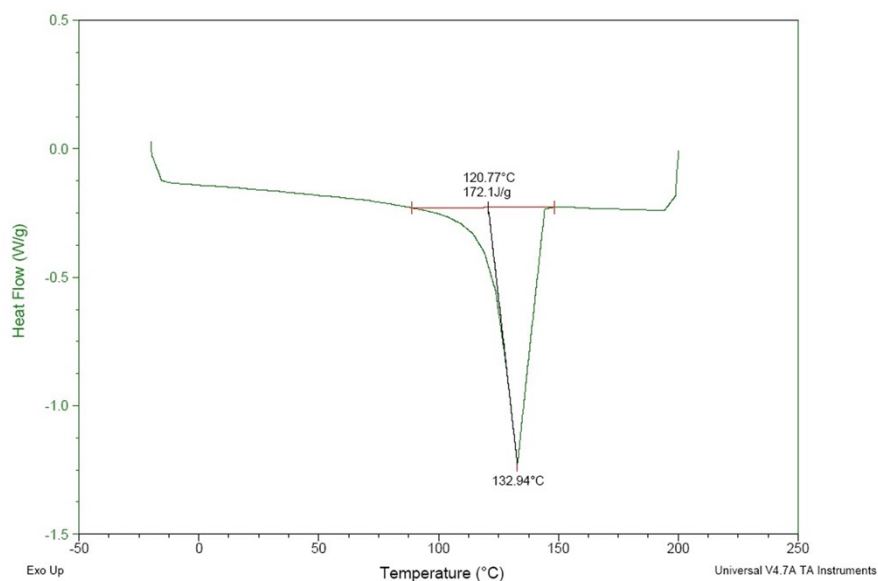

**Figure S1:** Differential Scanning Calorimetry (DSC) curve of HDPE

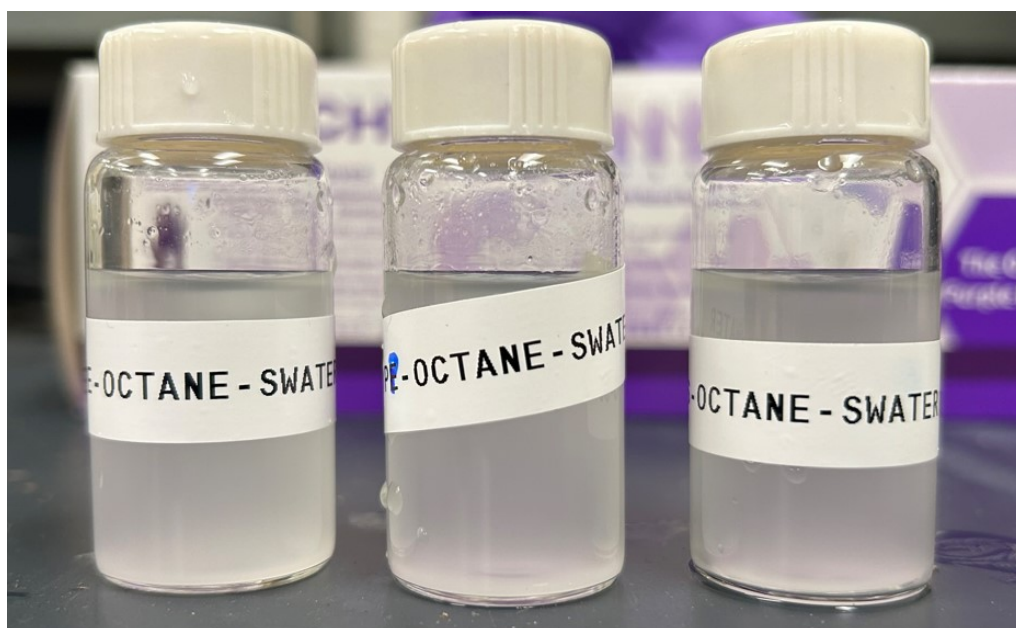

**Figure S2:** Photographs of emulsions produced from LDPE (left), PP (middle) and PS (right) in artificial sea water in the presence of 1% Octane.

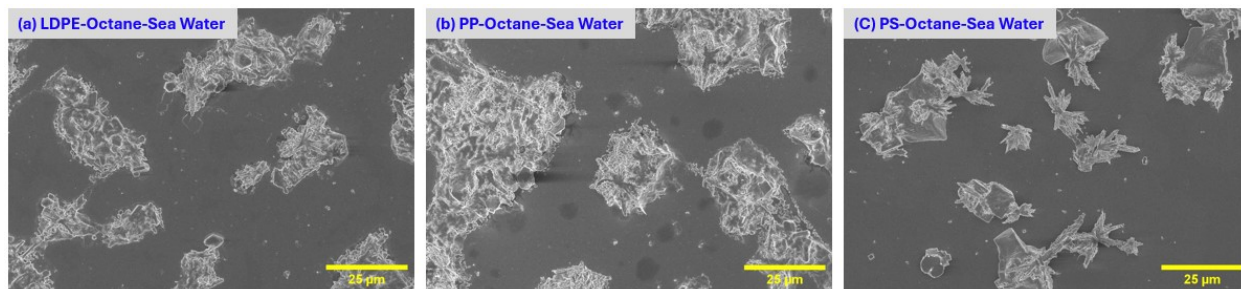

**Figure S3:** SEM images of emulsion samples from LDPE (left), PP (middle) and PS (right) in artificial sea water in the presence of 1% Octane, showing predominantly aggregates of salt crystals with no discernible sMPs and NPs.

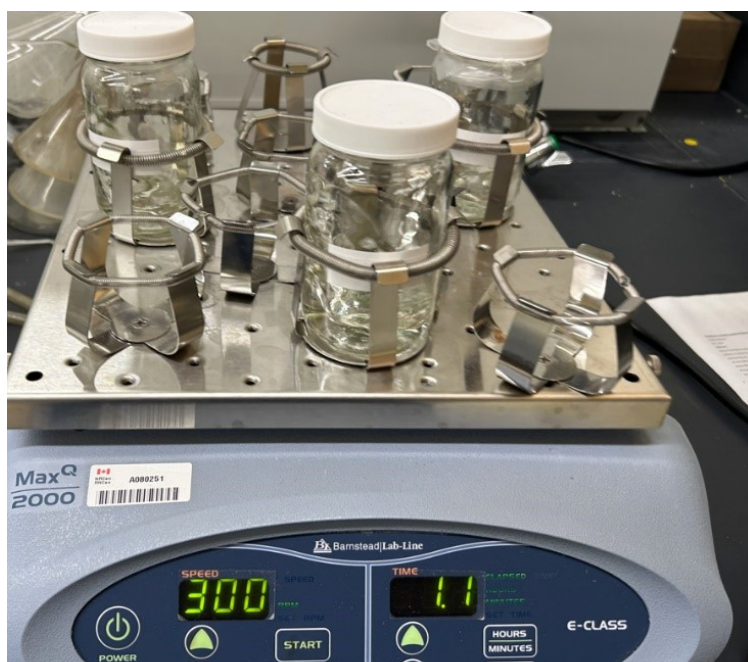

**Figure S4:** Rotary orbital shaker used for low-energy mixing.

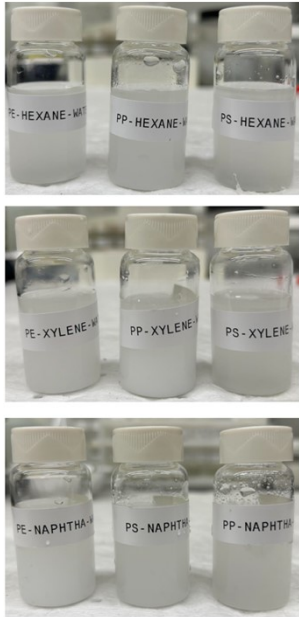

**Figure S5:** Photographs of emulsions containing mixtures of sMPs and NPs of LDPE, PP, and PS in water produced in the presence of hexanes (top), xylene (middle) and naphtha (bottom).

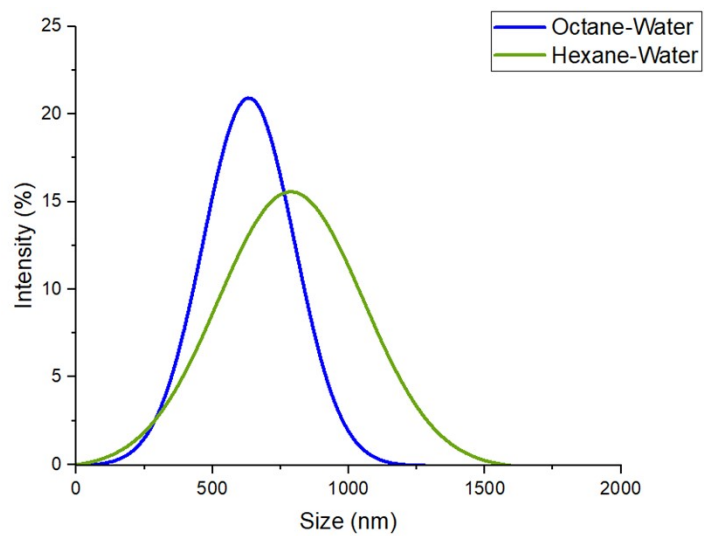

**Figure S6:** Size distribution of hexane-water and octane-water O/W emulsion droplets.

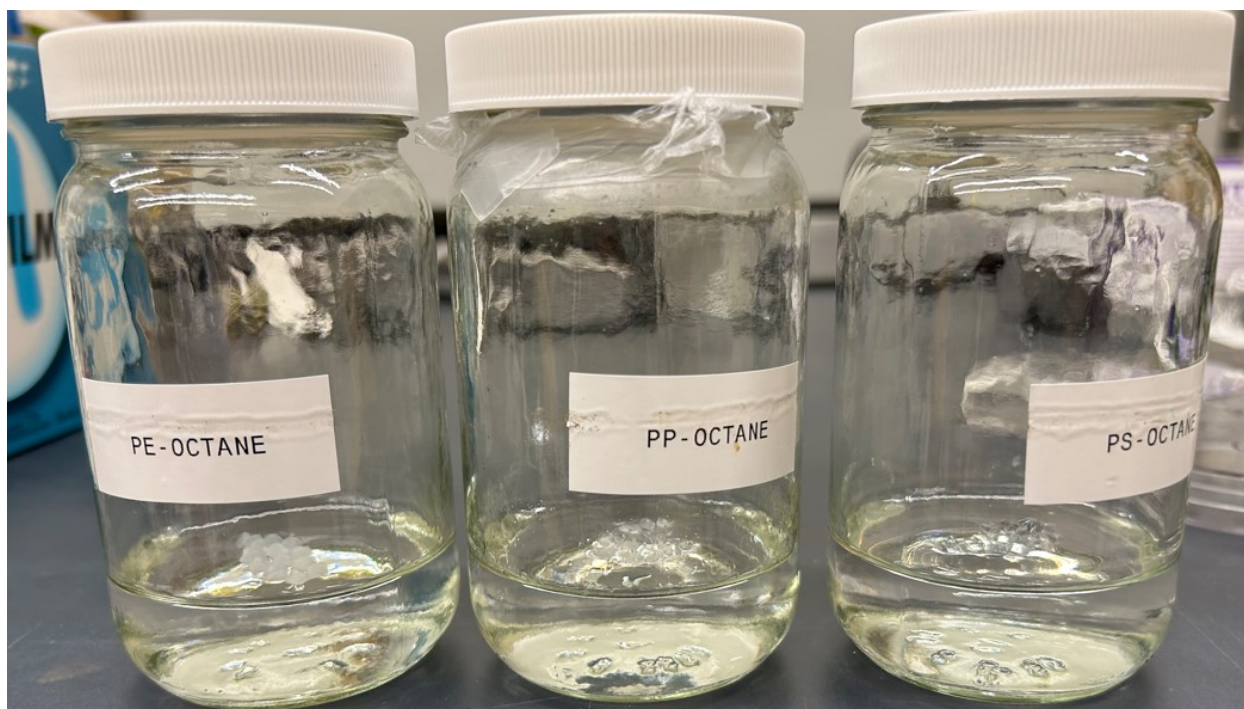

**Figure S7:** Photograph of water and nurdles (PE, PP, and PS) in the presence of octane after 24 hours of rotary agitation.

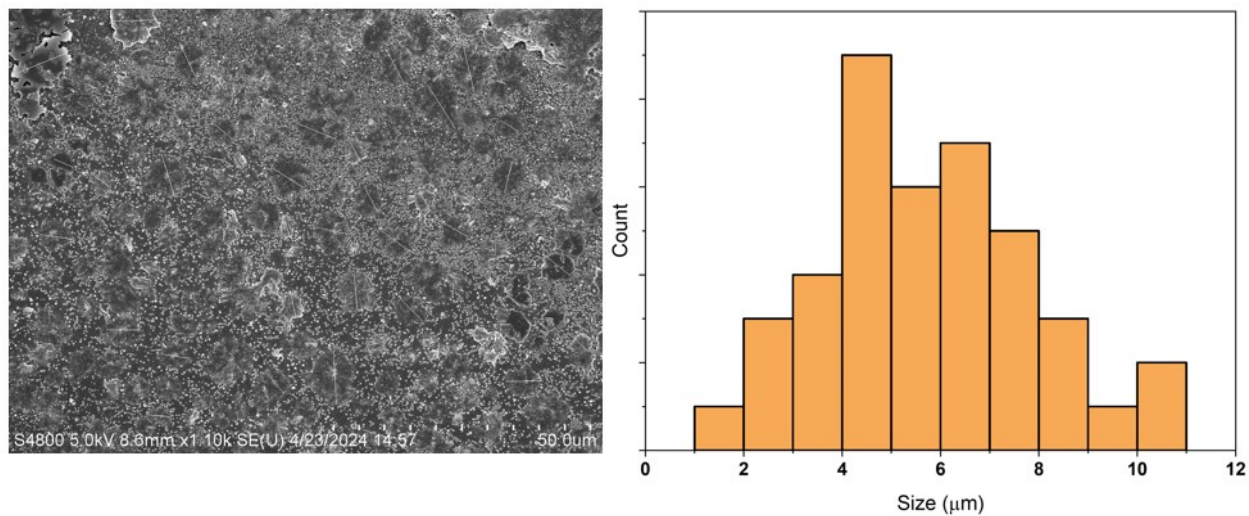

**Figure S8:** SEM image and corresponding size analysis of sMPs formed in water in the presence of 1% Octane.

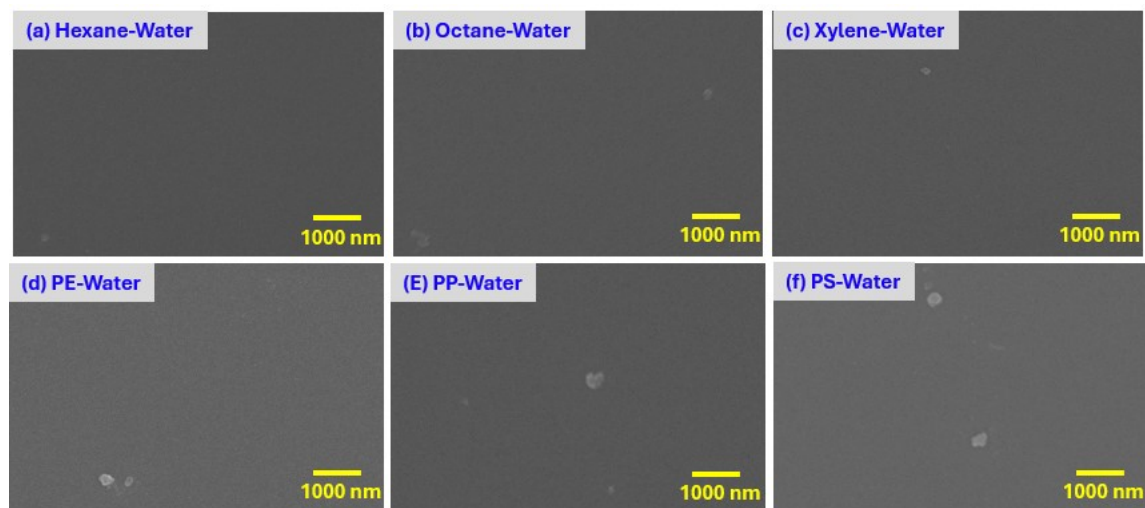

**Figure S9:** SEM images of control samples containing 1 vol% hydrocarbon impurities (top) and 1 wt% nurdles (bottom), prepared using ultrasonic agitation.

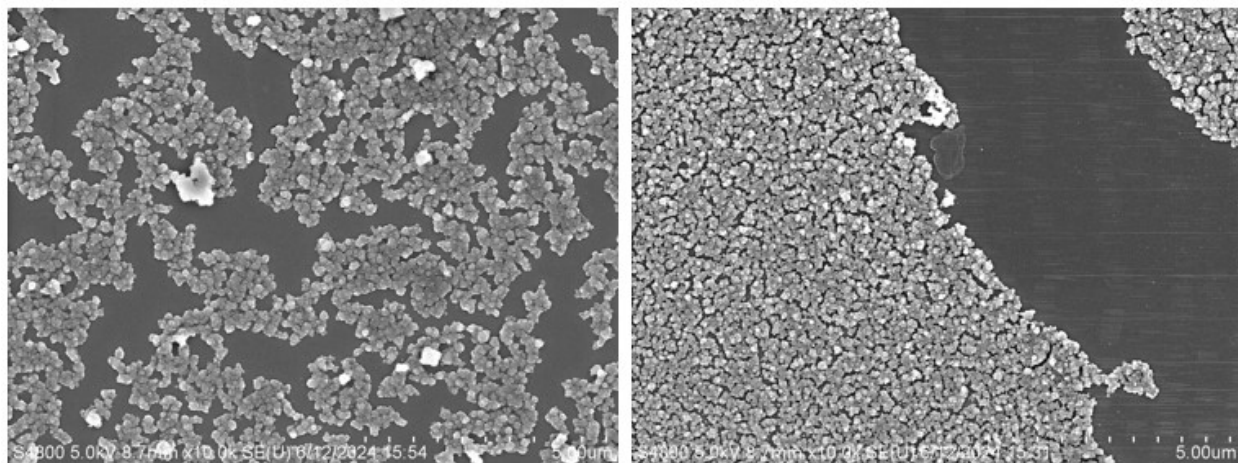

**Figure S10:** SEM images of PE NPs formed in water in the presence of ~1% naphtha. Note: the image at the right side shows the NP film formation due to the aggregation on the silicon substrate upon the evaporation of water.

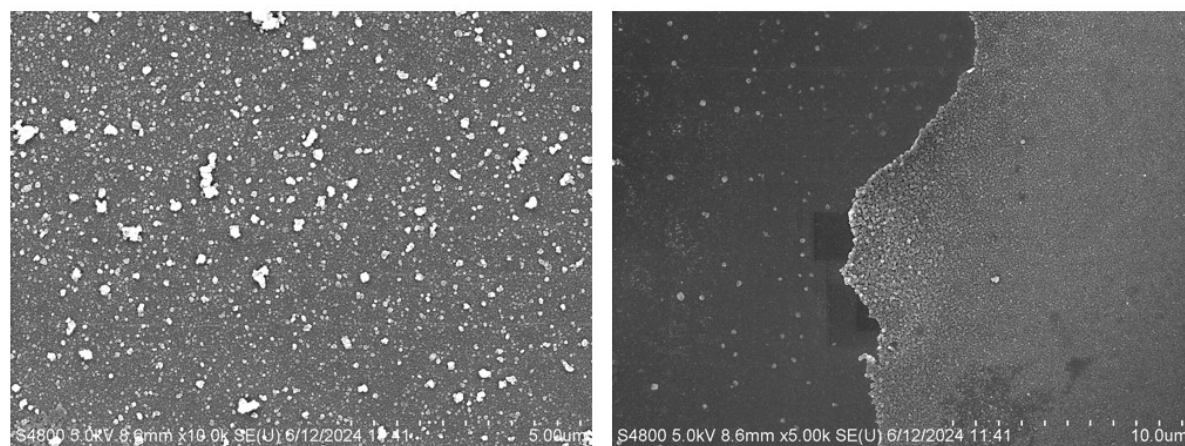

**Figure S11:** SEM images of PP NPs formed in water in the presence of ~1% naphtha. Note: the image at the right side shows the NP film formation due to the aggregation on the silicon substrate upon the evaporation of water.

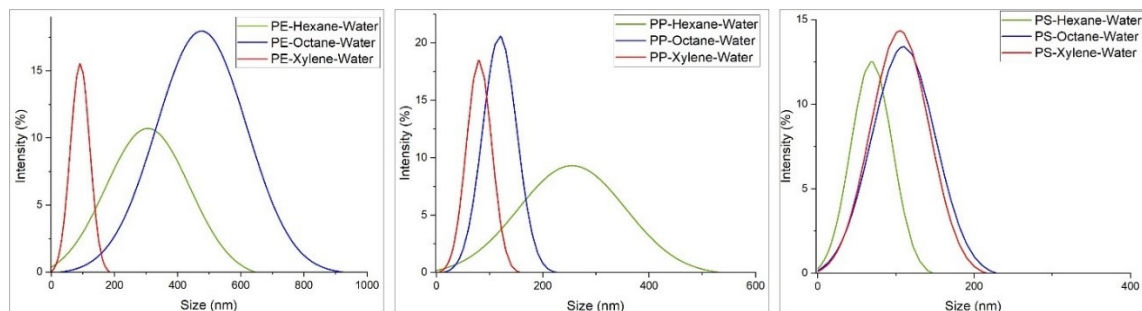

**Figure S12:** Average sizes of NPs produced in repeat experiments from LDPE (a), PP (b), and PS (c) in water in the presence of 1% hexane, octane and xylene, measured using dynamic light scattering.

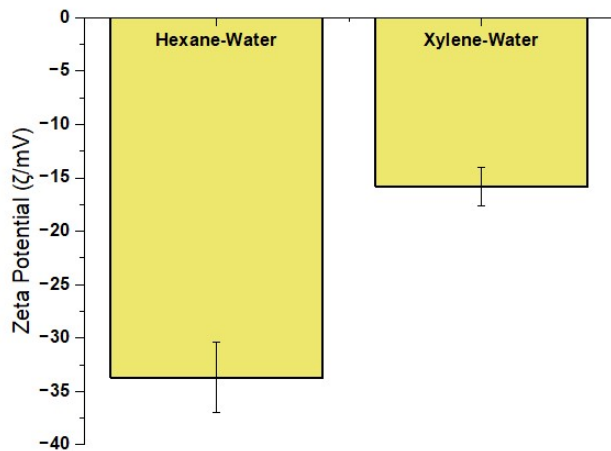

**Figure S13:** Zeta potentials of hexane-water and xylene-water-emulsions.

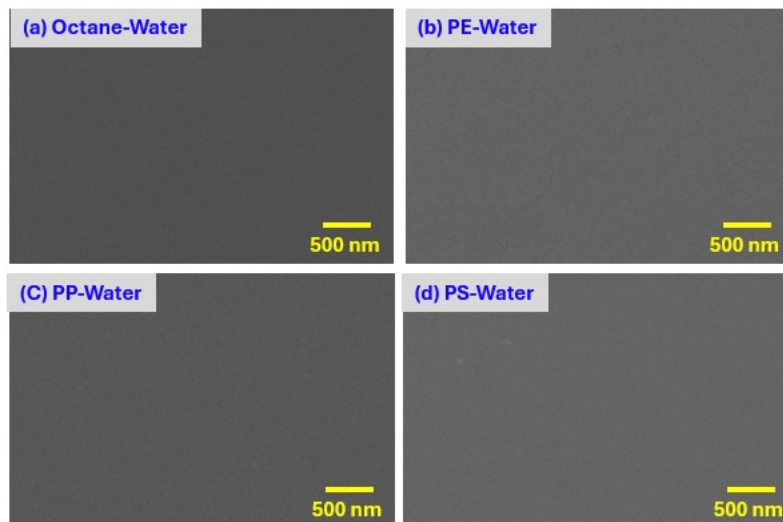

**Figure S14:** SEM images of control samples containing 1 vol% hydrocarbon impurities (top) and 1 wt% nurdles (bottom), prepared using ultrasonic agitation.

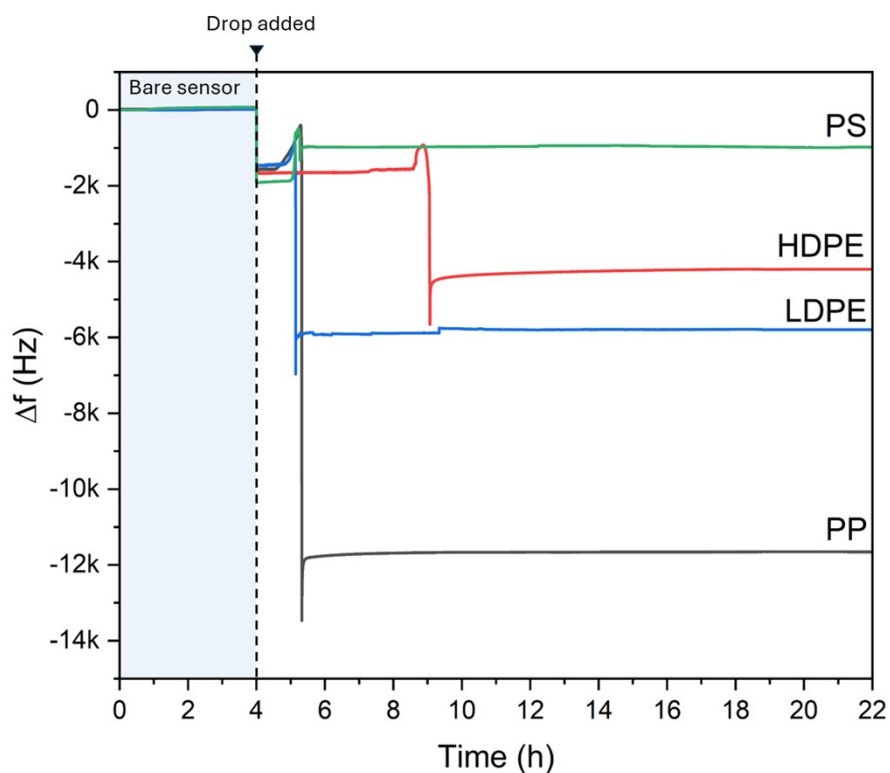

**Figure S15:** QCM analysis of filtered polymer-octane suspensions after sonication. Frequency shifts ( $\Delta f$ ) were monitored before, during, and after adding 20  $\mu\text{L}$  NP suspension on the sensor. The final frequency stabilization indicates complete evaporation of the liquid phase.

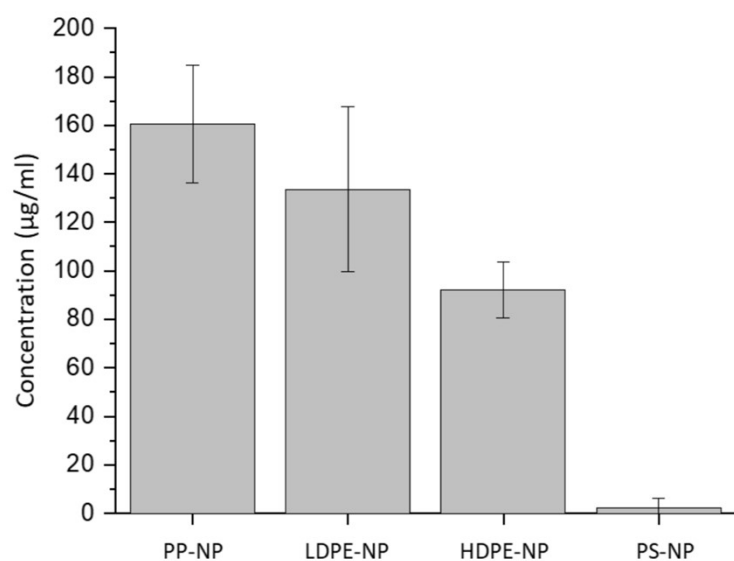

**Figure S16:** Concentration of filtered NP suspensions obtained from ultrasonic agitation of 150 mg nurdles in 15 mL of water and 150 µL of octane.

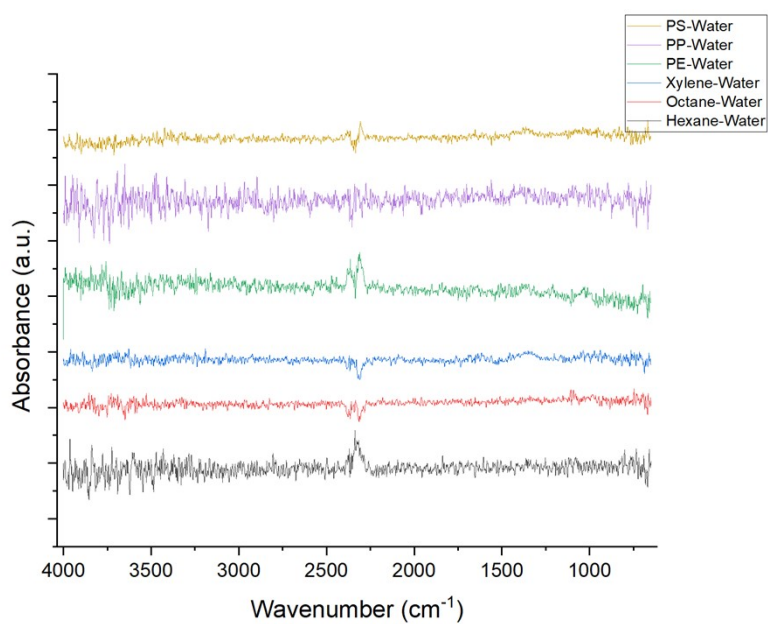

**Figure 17:** FTIR spectra of control samples, prepared from the mixtures of polymer-water and hydrocarbon-water mixture.

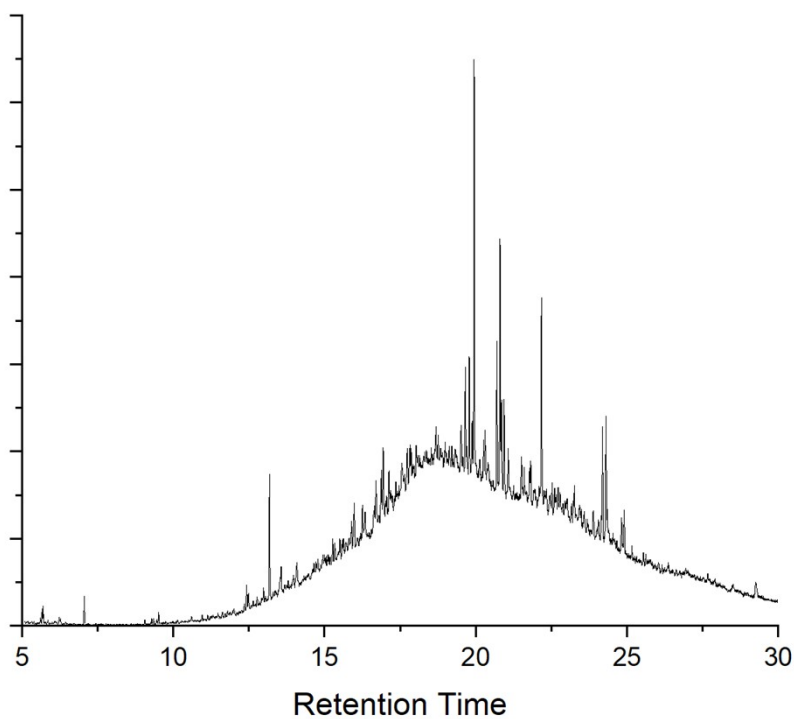

**Figure S18:** Total ion chromatogram of low-density polyethylene nurdle extract in octane

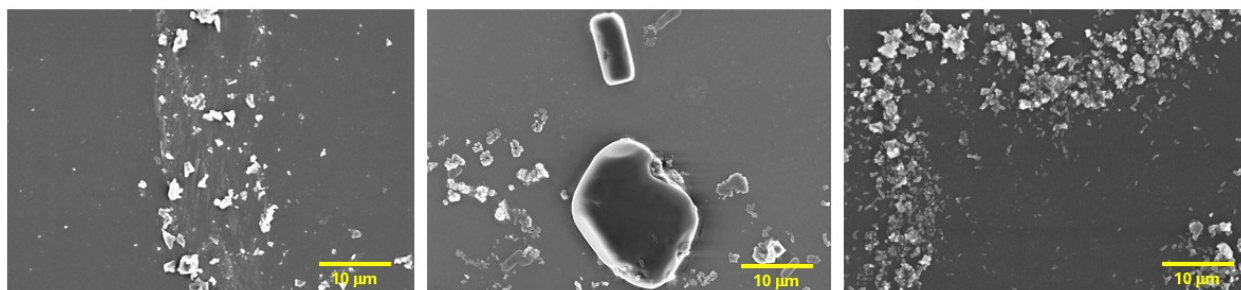

**Figure S19:** SEM images of secondary microplastics (SMPs) obtained after 30 min of ultrasonic agitation of oligomer-depleted PE nurdles in water containing 1 wt% octane.

**Reference:**

1. Flory, P.J. Thermodynamics of Crystallization in High Polymers. IV. A Theory of Crystalline States and Fusion in Polymers, Copolymers, and Their Mixtures with Diluents, *J. Chem. Phys.* 1949, **17**, 223-240

2. Standard Test Method for Determination of Individual Components in Spark Ignition Engine Fuels by 100 Meter Capillary High Resolution Gas Chromatography, **ASTM D6729-01**, 2017
